# Supplementary material for: Physical activity improves stress load, recovery, and academic performance-related parameters among university students: a longitudinal study on daily level
Source: PubMed Central journal article supplement (PMC10893600; doi:10.1186/s12889-024-18082-z), 2024-02-24
Supplement: 12889_2024_18082_MOESM1_ESM.pdf [file 12889_2024_18082_MOESM1_ESM.pdf]

1 **Supplement**

2 *Supplement Table 1: Overview of the models tested with 46 imputed datasets (\* p < 0.05, \*\* p < 0.01, \*\*\* p < 0.001)*

|                           |                                                    | Stress load & recovery parameters                                    |                            |                            | Academic performance-related parameters |                             |                            |
|---------------------------|----------------------------------------------------|----------------------------------------------------------------------|----------------------------|----------------------------|-----------------------------------------|-----------------------------|----------------------------|
|                           |                                                    | Estimate b (SE)                                                      |                            |                            | Estimate b (SE)                         |                             |                            |
|                           |                                                    | Functional Stress Model                                              | Dysfunctional Stress Model | Detachment Model           | Attention Difficulties Model            | Study Ability Model         |                            |
| Level 1<br>time-varying   | Intercept                                          | <b>3.848***</b><br>(0.100)                                           | <b>2.464***</b><br>(0.104) | <b>3.227***</b><br>(0.076) | <b>2.292***</b><br>(0.063)              | <b>12.886***</b><br>(0.233) |                            |
|                           | PA behavior                                        | PA breaks via ESD min (cw2)                                          | <b>0.052***</b><br>(0.026) | -0.005<br>(0.008)          | 0.009<br>(0.010)                        | -0.005<br>(0.007)           | 0.142***<br>(0.039)        |
|                           |                                                    | LTPA min (cw2)                                                       | <b>0.004***</b><br>(0.001) | <b>-0.002**</b><br>(0.001) | <b>0.002**</b><br>(0.001)               | <b>-0.002***</b><br>(0.001) | <b>0.011***</b><br>(0.003) |
|                           | Covariates                                         | Number of breaks (cw2)                                               | 0.025<br>(0.037)           | -0.020<br>(0.023)          | <b>-0.060**</b><br>(0.021)              | -0.006<br>(0.017)           | <b>0.178*</b><br>(0.079)   |
|                           |                                                    | Longest stretch of time without a break spent on home studying (cw2) | -0.009<br>(0.079)          | -0.023<br>(0.037)          | <b>-0.126**</b><br>(0.040)              | 0.049*<br>(0.028)           | 0.207<br>(0.151)           |
| Level 2<br>time invariant | Age (c2)                                           | 0.032<br>(0.036)                                                     | 0.012<br>(0.043)           | 0.005<br>(0.026)           | 0.026<br>(0.021)                        | 0.035<br>(0.089)            |                            |
|                           | Outcome specific baseline covariates <sup>a)</sup> | T0 well-being (c2)                                                   | <b>0.045*</b><br>(0.027)   | -0.027<br>(0.022)          |                                         |                             |                            |
|                           |                                                    | T0 detachment (c2)                                                   |                            |                            | <b>0.4730***</b><br>(0.102)             |                             |                            |
|                           |                                                    | T0 study demands scale (c2)                                          |                            |                            |                                         | <b>0.202***</b><br>(0.069)  |                            |
|                           |                                                    | T0 SAI (c2)                                                          |                            |                            |                                         |                             | <b>0.248***</b><br>(0.080) |

3 <sup>a)</sup> Those variables were only included in the appropriate model since they are outcome-specific covariates.

4 cw = centered within, c2 = grand centered, PA = physical activity, ESD = exercise snack digital, LTPA = leisure-times physical activity, SE = standard error

5  
6
