# Supplementary material for: Physical activity improves stress load, recovery, and academic performance-related parameters among university students: a longitudinal study on daily level
Source: PubMed Central journal article supplement (PMC10893600; doi:10.1186/s12889-024-18082-z), 2024-02-24
Supplement: 12889_2024_18082_MOESM2_ESM.pdf [file 12889_2024_18082_MOESM2_ESM.pdf]

## Centering variables

- Day-level variables on persons mean (centered within)
- Variables describing the person level assessed at T0 around the grand mean

## Pre-analyses of Random-Intercept-Only models

- *ICC* of at least 0.10 (range 0.26 – 0.64)
- Confirmation to perform multilevel analyses

## Calculation of the hierarchical models

- Five regression models with all variables entered
- Three models belonged to hypothesis 1 and two models to hypothesis 2

## Handling missing data

Multiple imputation

Recalculating models

Pooling estimates

Comparison main analysis & sensitivity analysis
